# Supplementary material for: Tumour Size and T-Stage in Pancreatic Cancer Resection Specimens Depend on the Pathology Examination Approach
Source: MDPI journal article supplement (doi:10.3390/cancers14102471), 2022-05-17
Supplement: s1 [file s1]

# Tumour Size and T-Stage in Pancreatic Cancer Resection Specimens Depend on the Pathology Examination Approach

**Table S1.** Change in T-stage assignment when comparing the simple approach (2D-macro) with the three more elaborate approaches to tumour size measurement.

|            | 2D-Macro vs. 2D Micro |                   | 2D-Macro vs. 3D-Macro |           | 2D-Macro vs. 2D-3D-Micro |           |
|------------|-----------------------|-------------------|-----------------------|-----------|--------------------------|-----------|
|            | Head                  | Body/Tail         | Head                  | Body/Tail | Head                     | Body/Tail |
| <b>T1</b>  | <b>(n = 26) *</b>     | <b>(n = 12) *</b> |                       |           |                          |           |
| No changes | 8 (31)                | 11 (92)           | 12 (46)               | 4 (33)    | 1 (4)                    | 4 (33)    |
| T1 → T2    | 18 (69)               | 1 (8)             | 13 (50)               | 7 (58)    | 19 (73)                  | 8 (67)    |
| T1 → T3    | 0 (0)                 | 0 (0)             | 1 (4)                 | 1 (9)     | 6 (23)                   | 0 (0)     |
| <b>T2</b>  | <b>(n = 176) *</b>    | <b>(n = 55) *</b> |                       |           |                          |           |
| No changes | 162 (92)              | 48 (87)           | 137 (78)              | 22 (40)   | 119 (68)                 | 25 (45)   |
| T1 → T2    | 12 (7)                | 12 (7)            | 22 (12)               | 30 (55)   | 55 (31)                  | 29 (53)   |
| T1 → T3    | 2 (1)                 | 5 (9)             | 1 (4)                 | 3 (5)     | 2 (1)                    | 1 (2)     |
| <b>T3</b>  | <b>(n = 29) *</b>     | <b>(n = 17) *</b> |                       |           |                          |           |
| No changes | 16 (55)               | 13 (76)           | 12 (41)               | 14 (82)   | 9 (31)                   | 15 (88)   |
| T1 → T2    | 13 (45)               | 3 (18)            | 15 (52)               | 3 (18)    | 18 (62)                  | 2 (12)    |
| T1 → T3    | 0 (0)                 | 1 (6)             | 2 (7)                 | 0 (0)     | 2 (7)                    | 0 (0)     |

\* Number of tumours assigned to the T-category based on 2D-macro assessment.

**Table S2.** T-stage distribution in pancreatic cancer series.

| Study                      | % T1 | % T2 | % T3 |
|----------------------------|------|------|------|
| <b>Current</b>             |      |      |      |
| • 2D-macro                 | 12   | 73   | 15   |
| • 2D-3D-micro              | 3    | 61   | 36   |
| <b>Saka 2016 [22]</b>      |      |      |      |
| • Institutional series     | 13   | 64   | 23   |
| • SEER series              | 17   | 55   | 28   |
| • “Ordinary cases”         | 20   | 56   | 24   |
| <b>Shin 2019 [18]</b>      | 13.1 | 66.5 | 20.5 |
| <b>Kwon 2018 [20]</b>      | 19.6 | 63.8 | 16.6 |
| <b>Park 2019 [17]</b>      | 14.5 | 65.5 | 20.0 |
| <b>Schlitter 2017 [23]</b> |      |      |      |
| • Berlin series            | 12.0 | 69.3 | 18.7 |
| • Munich series            | 13.5 | 65.3 | 21.2 |
| <b>Kamarajah 2017 [19]</b> | 17   | 58   | 25   |

**Table S3.** *n*-stage distribution for T-stages according to different approaches to tumour size measurement.

|               | <b>N0</b><br><i>n</i> (%) | <b>N1</b><br><i>n</i> (%) | <b>N2</b><br><i>n</i> (%) | <b><i>p</i>-Value</b> |
|---------------|---------------------------|---------------------------|---------------------------|-----------------------|
| <b>T1</b>     |                           |                           |                           | 0.03                  |
| • 2D-macro    | 9 (24)                    | 19 (52)                   | 9 (24)                    |                       |
| • 2D-3D-micro | 5 (56)                    | 4 (44)                    | 0 (0)                     |                       |
| <b>T2</b>     |                           |                           |                           | 0.03                  |
| • 2D-macro    | 21 (9)                    | 78 (34)                   | 132 (57)                  |                       |
| • 2D-3D-micro | 22 (12)                   | 81 (42)                   | 88 (46)                   |                       |
| <b>T3</b>     |                           |                           |                           | 0.20                  |
| • 2D-macro    | 1 (2)                     | 18 (39)                   | 27 (59)                   |                       |
| • 2D-3D-micro | 4 (4)                     | 30 (26)                   | 80 (70)                   |                       |
